# Supplementary material for: Possible opportunities and challenges for traditional Chinese medicine research in 2035
Source: Front Pharmacol. 2024 Jun 21;15:1426300. doi: 10.3389/fphar.2024.1426300 (PMC11224461; doi:10.3389/fphar.2024.1426300)
Supplement: Supplementary file 2 [file DataSheet1.xlsx]

## Sheet: sheet1
Phrase	Number of times	Number of words	Number of entries	TF-IDF
integration	8	1	8	0.00838157
modern medicine	7	2	7	0.00841565
standardization	6	1	6	0.00826463
scientific validation	5	2	5	0.00789847
ai	4	1	3	0.00844677
regulatory hurdles	4	2	4	0.00727565
education	4	1	4	0.00727565
globalization	3	1	3	0.00633508
technological advancements	3	2	3	0.00633508
global recognition	3	2	3	0.00633508
technology	3	1	3	0.00633508
training	3	1	3	0.00633508
quality control	3	2	3	0.00633508
increased funding	2	2	2	0.0049783
advances	2	1	2	0.0049783
biodiversity	2	1	2	0.0049783
conservation	2	1	2	0.0049783
policy support	2	2	2	0.0049783
innovation	2	1	2	0.0049783
regulation	2	1	2	0.0049783
tcm	2	1	2	0.0049783
intellectual property rights	2	3	2	0.0049783
intellectual property	2	2	2	0.0049783
big data	1	2	1	0.00302115
mechanism validation	1	2	1	0.00302115
personalized medicine	1	2	1	0.00302115
drug discovery	1	2	1	0.00302115
advanced analytics	1	2	1	0.00302115
ai powered diagnostics	1	3	1	0.00302115
genetic studies	1	2	1	0.00302115
standardized practices	1	2	1	0.00302115
global collaboration	1	2	1	0.00302115
increased acceptance	1	2	1	0.00302115
support	1	1	1	0.00302115
demand	1	1	1	0.00302115
natural and holistic approaches	1	4	1	0.00302115
modernization and internationalization, evidence-based medicine research	1	6	1	0.00302115
interdisciplinary collaboration	1	2	1	0.00302115
traditional	1	1	1	0.00302115
acceptance	1	1	1	0.00302115
pharmacological research	1	2	1	0.00302115
heritage	1	1	1	0.00302115
public health emergencies	1	3	1	0.00302115
medicine	1	1	1	0.00302115
artificial intelligence and machine learning, advanced imaging techniques	1	8	1	0.00302115
advancements	1	1	1	0.00302115
international collaboration	1	2	1	0.00302115
sustainability	1	1	1	0.00302115
tools	1	1	1	0.00302115
diagnosis accuracy	1	2	1	0.00302115
treatment efficacy	1	2	1	0.00302115
collaborations	1	1	1	0.00302115
western medicine	1	2	1	0.00302115
ai's capability	1	2	1	0.00302115
vast amounts	1	2	1	0.00302115
data	1	1	1	0.00302115
cultural perceptions	1	2	1	0.00302115
stigma	1	1	1	0.00302115
scientific rigor	1	2	1	0.00302115
modernization	1	1	1	0.00302115
practices	1	1	1	0.00302115
standardization and quality control	1	4	1	0.00302115
regulatory and safety concerns	1	4	1	0.00302115
limited scientific evidence	1	3	1	0.00302115
traditional knowledge protection	1	3	1	0.00302115
competition	1	1	1	0.00302115
market pressures	1	2	1	0.00302115
differences	1	1	1	0.00302115
theory	1	1	1	0.00302115
practice	1	1	1	0.00302115
establishment	1	1	1	0.00302115
research methods	1	2	1	0.00302115
standards	1	1	1	0.00302115
quality	1	1	1	0.00302115
supply	1	1	1	0.00302115
medicinal materials	1	2	1	0.00302115
talent cultivation	1	2	1	0.00302115
patents	1	1	1	0.00302115
cultural and philosophical differences	1	4	1	0.00302115
research	1	1	1	0.00302115
linguistic	1	1	1	0.00302115
barriers	1	1	1	0.00302115
resource allocation	1	2	1	0.00302115
more rigorous clinical trials	1	4	1	0.00302115
understanding	1	1	1	0.00302115
the mechanisms	1	2	1	0.00302115
compatibility	1	1	1	0.00302115
resource scarcity	1	2	1	0.00302115
conventional workflows	1	2	1	0.00302115
doctor-patient relationships	1	2	1	0.00302115
lack	1	1	1	0.00302115
humanistic care	1	2	1	0.00302115
ai applications	1	2	1	0.00302115
uncertainty	1	1	1	0.00302115
individualized needs	1	2	1	0.00302115
legislation	1	1	1	0.00302115
treatment	1	1	1	0.00302115
